# Supplementary material for: In-modified Sn-MOFs with high catalytic performance in formate electrosynthesis from aqueous carbon dioxide
Source: Royal Society of Chemistry journal article supplement (doi:10.1039/d3dt01610b), 2023-01-01
Supplement: d3dt01610b1.pdf [file d3dt01610b1.pdf]

# Supporting Information

## **In-modified Sn-MOFs with high catalytic performance in formate electrosynthesis from aqueous carbon dioxide**

Jiaying Yan<sup>a</sup>, Xuanyu Wang<sup>a</sup>, Fanghua Ning<sup>a</sup>, Jin Yi<sup>a</sup>, Yuyu Liu<sup>a,\*</sup>, Kai Wu<sup>b,\*</sup>

<sup>a</sup> Institute for Sustainable Energy, College of Sciences, Shanghai University, Baoshan District, Shanghai 200444, China.

<sup>b</sup> Nanotechnology Research Institute, College of Materials and Textile Engineering, Jiaxing University, Jiaxing 314001, China.

-----  
\*E-mail addresses: liuyuyu2014@126.com (Y. Liu); wk220802@zjxu.edu.cn (K. Wu).

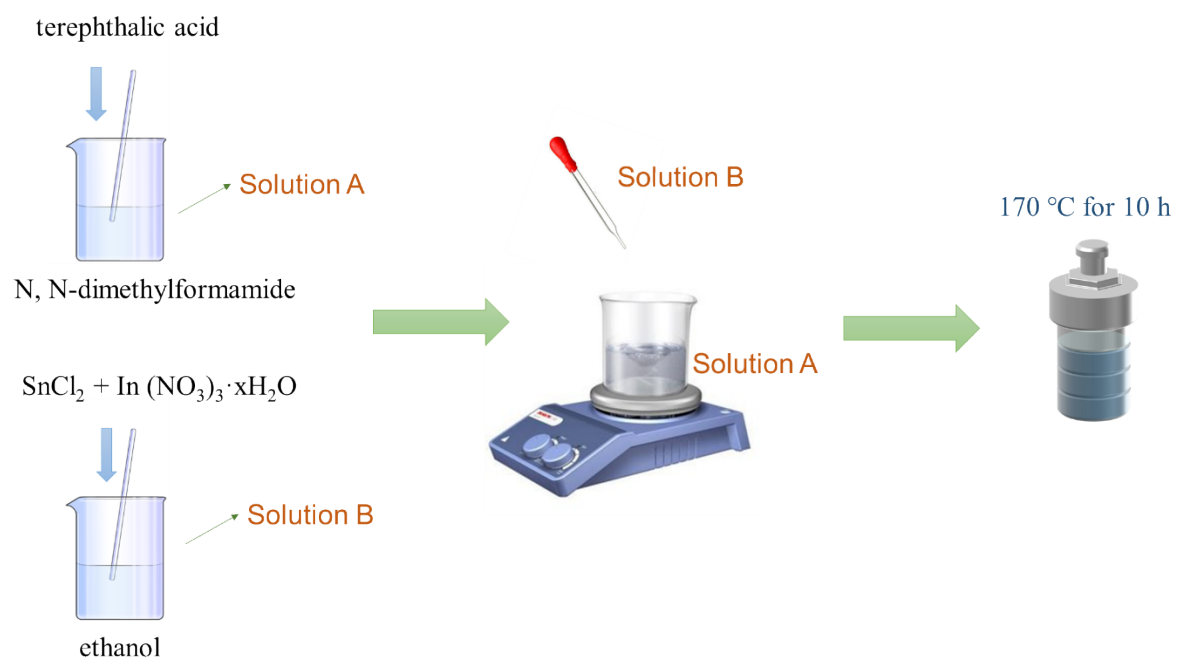

**Fig. S1.** Schematic illustration of the material synthesis process.

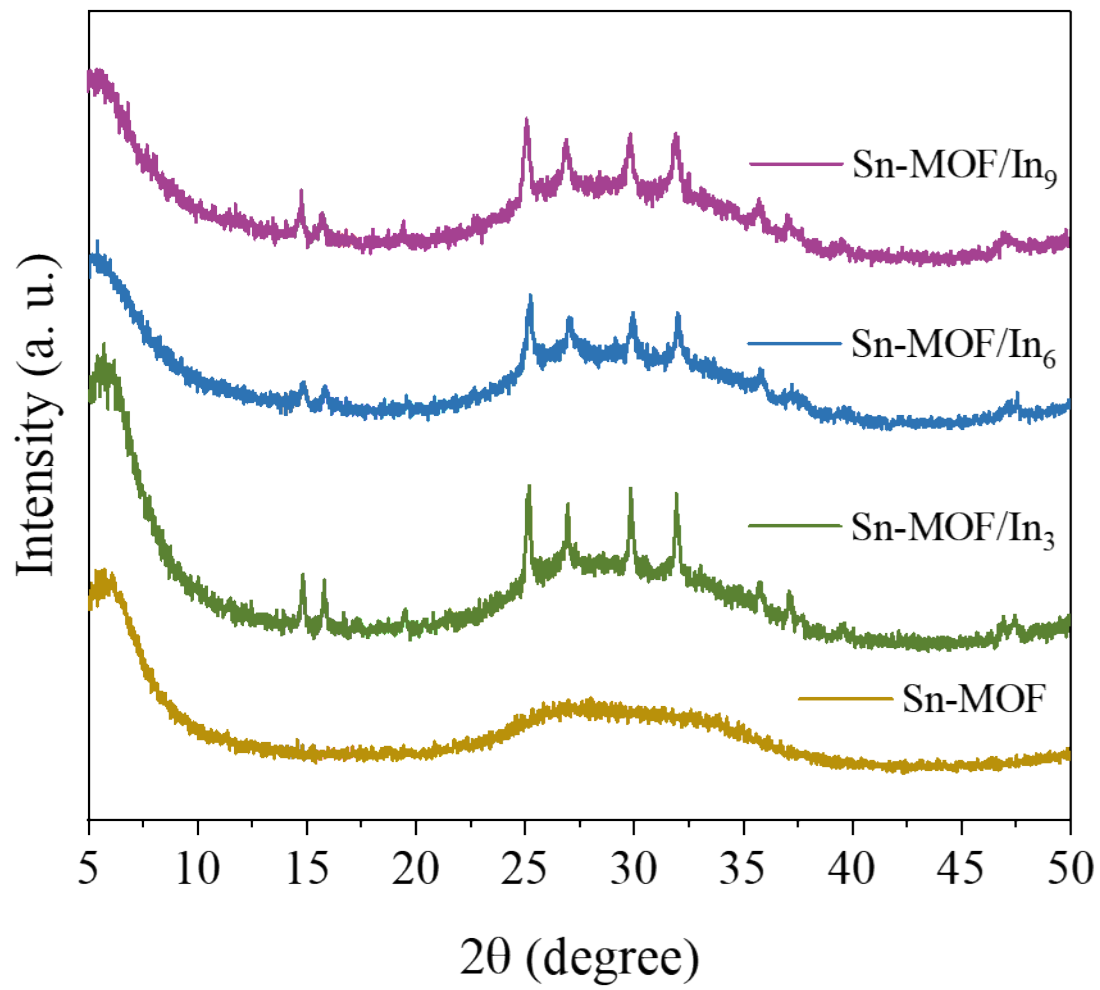

**Fig. S2.** XRD patterns of Sn-MOF, Sn-MOF/In<sub>3</sub>, Sn-MOF/In<sub>6</sub>, Sn-MOF/In<sub>9</sub>.

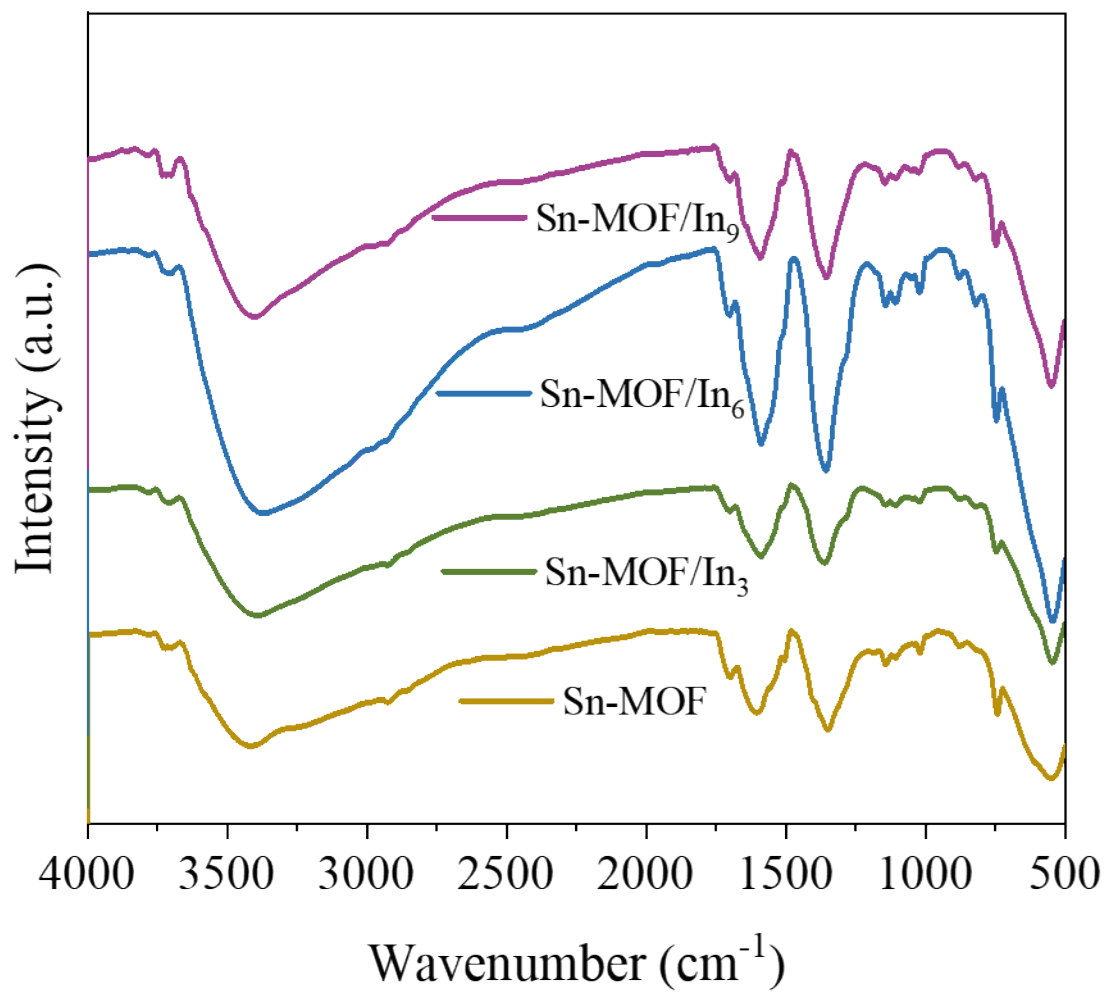

**Fig. S3.** FTIR patterns of Sn-MOF, Sn-MOF/In<sub>3</sub>, Sn-MOF/In<sub>6</sub>, Sn-MOF/In<sub>9</sub>.

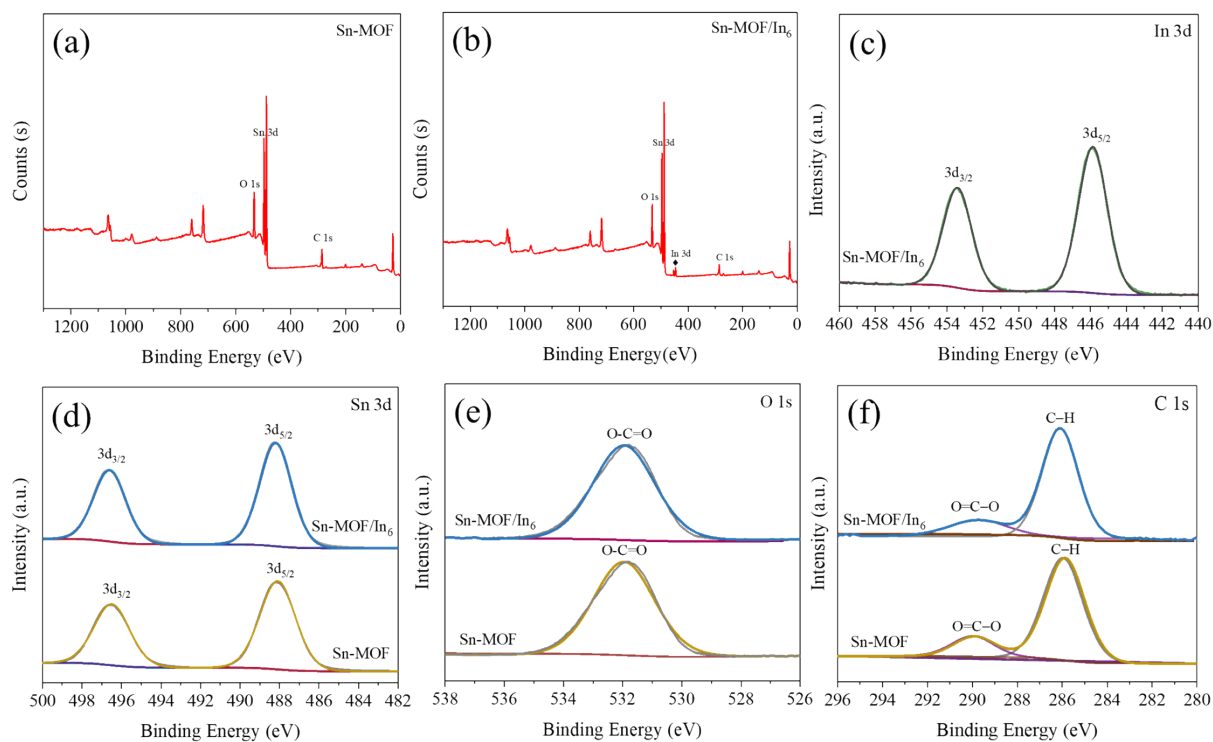

**Fig. S4.** XPS full spectrum of (a) Sn-MOF, (b) Sn-MOF/In<sub>6</sub>. The corresponding high resolution XPS spectra of the (c) In 3d, (d) Sn 3d, (e) O 1s and (f) C 1s spectra of Sn-MOF and Sn-MOF/In<sub>6</sub>.

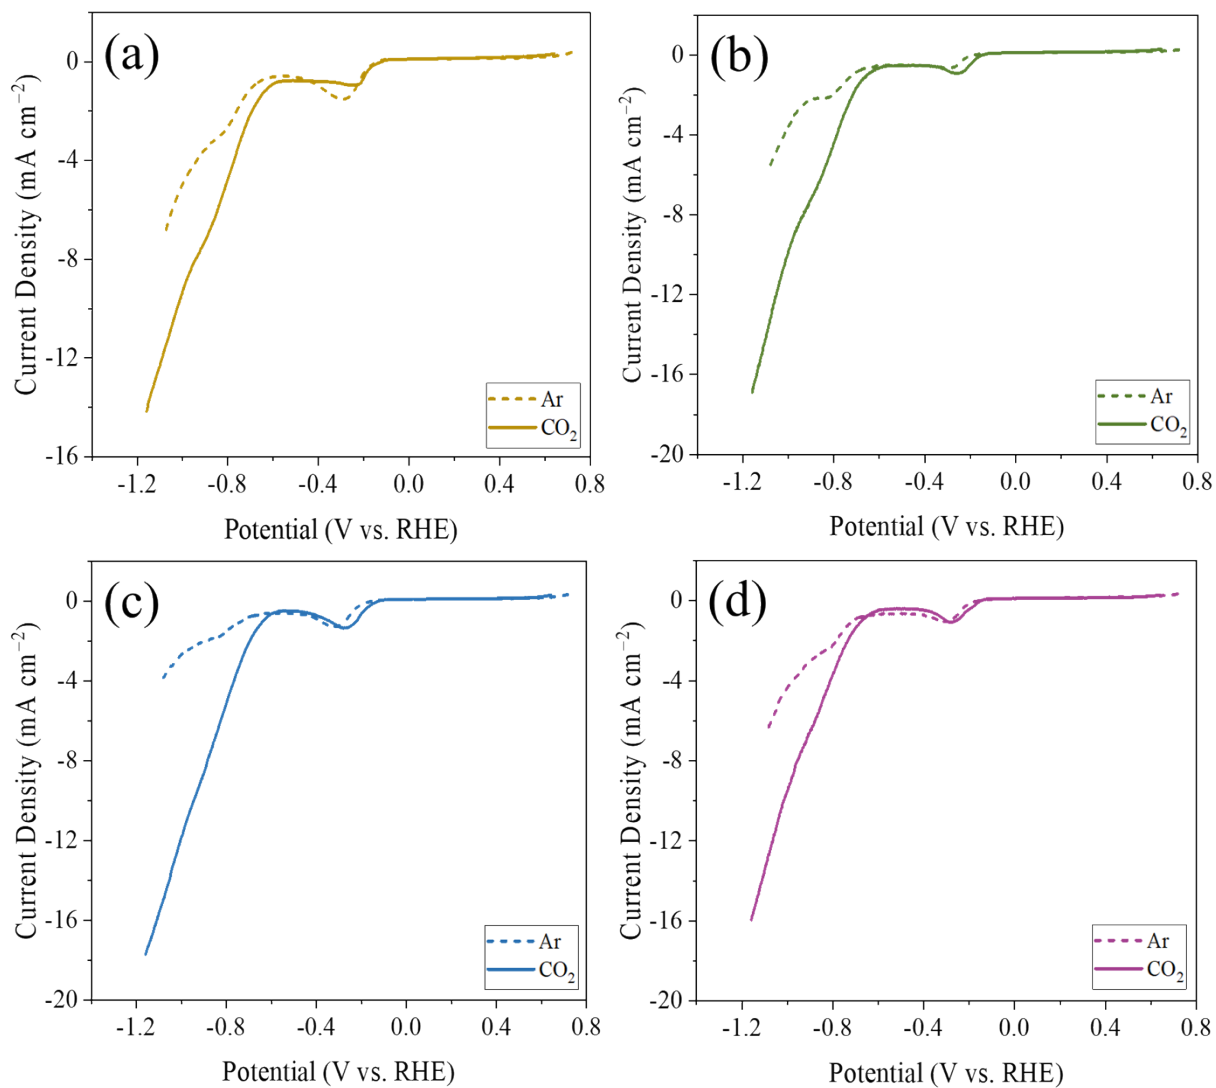

**Fig. S5.** LSV curves of (a) Sn-MOF (b) Sn-MOF/In<sub>3</sub> (c) Sn-MOF/In<sub>6</sub> (d) Sn-MOF/ In<sub>9</sub>.

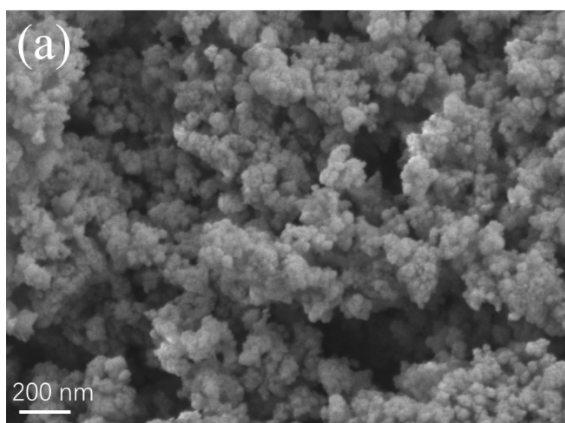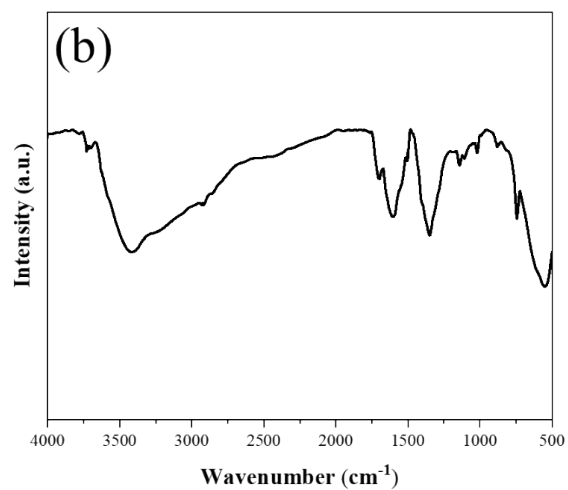

**Fig. S6.** (a) SEM image (b) FTIR pattern of Sn-MOF/In<sub>6</sub> after stability test.

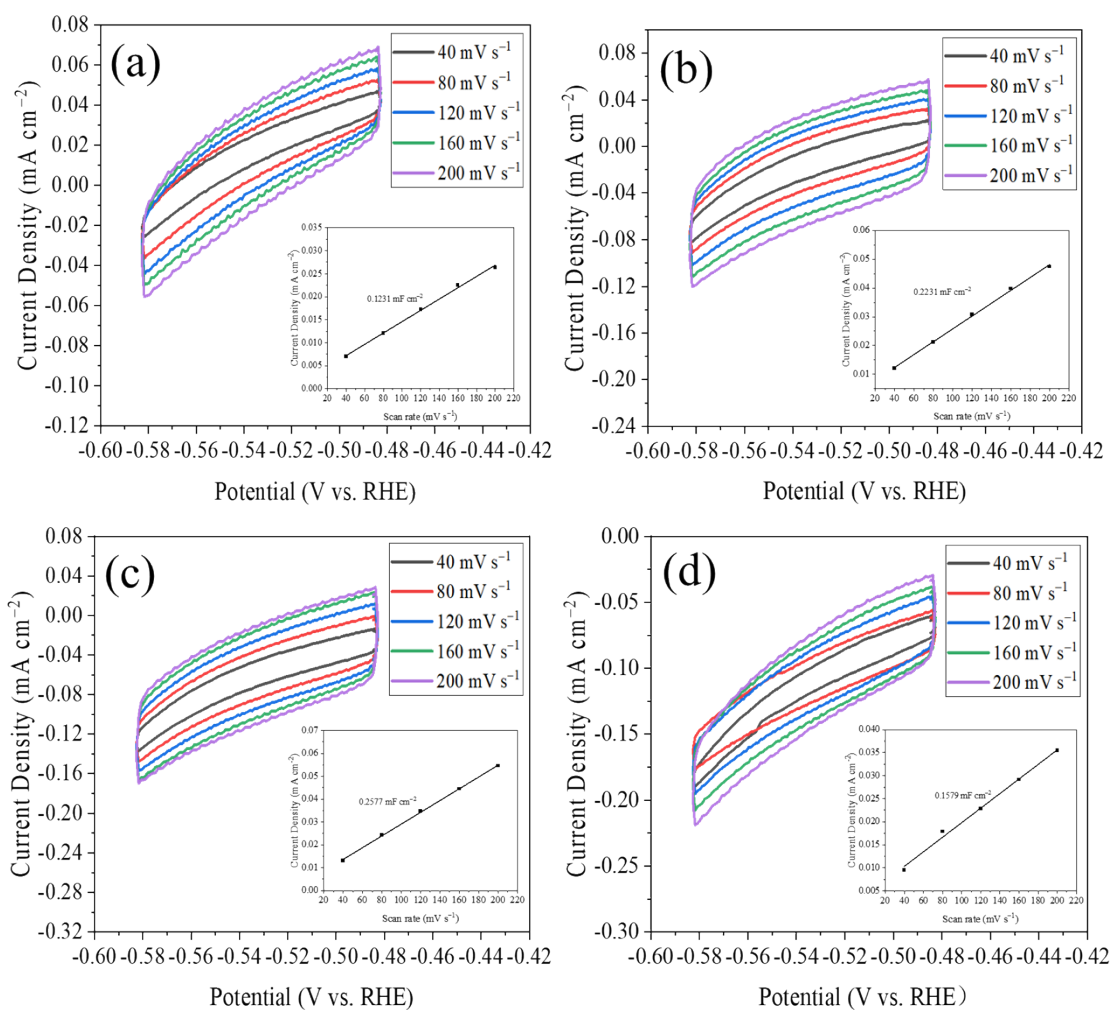

**Fig. S7.** CV curves of the catalysts at different sweep speeds: (a) Sn-MOF; (b) Sn-MOF/ $\text{In}_3$ , (c) Sn-MOF/ $\text{In}_6$ , (d) Sn-MOF/ $\text{In}_9$  (The embedded graph is Double-layer capacitance against scan rates of each catalyst material).



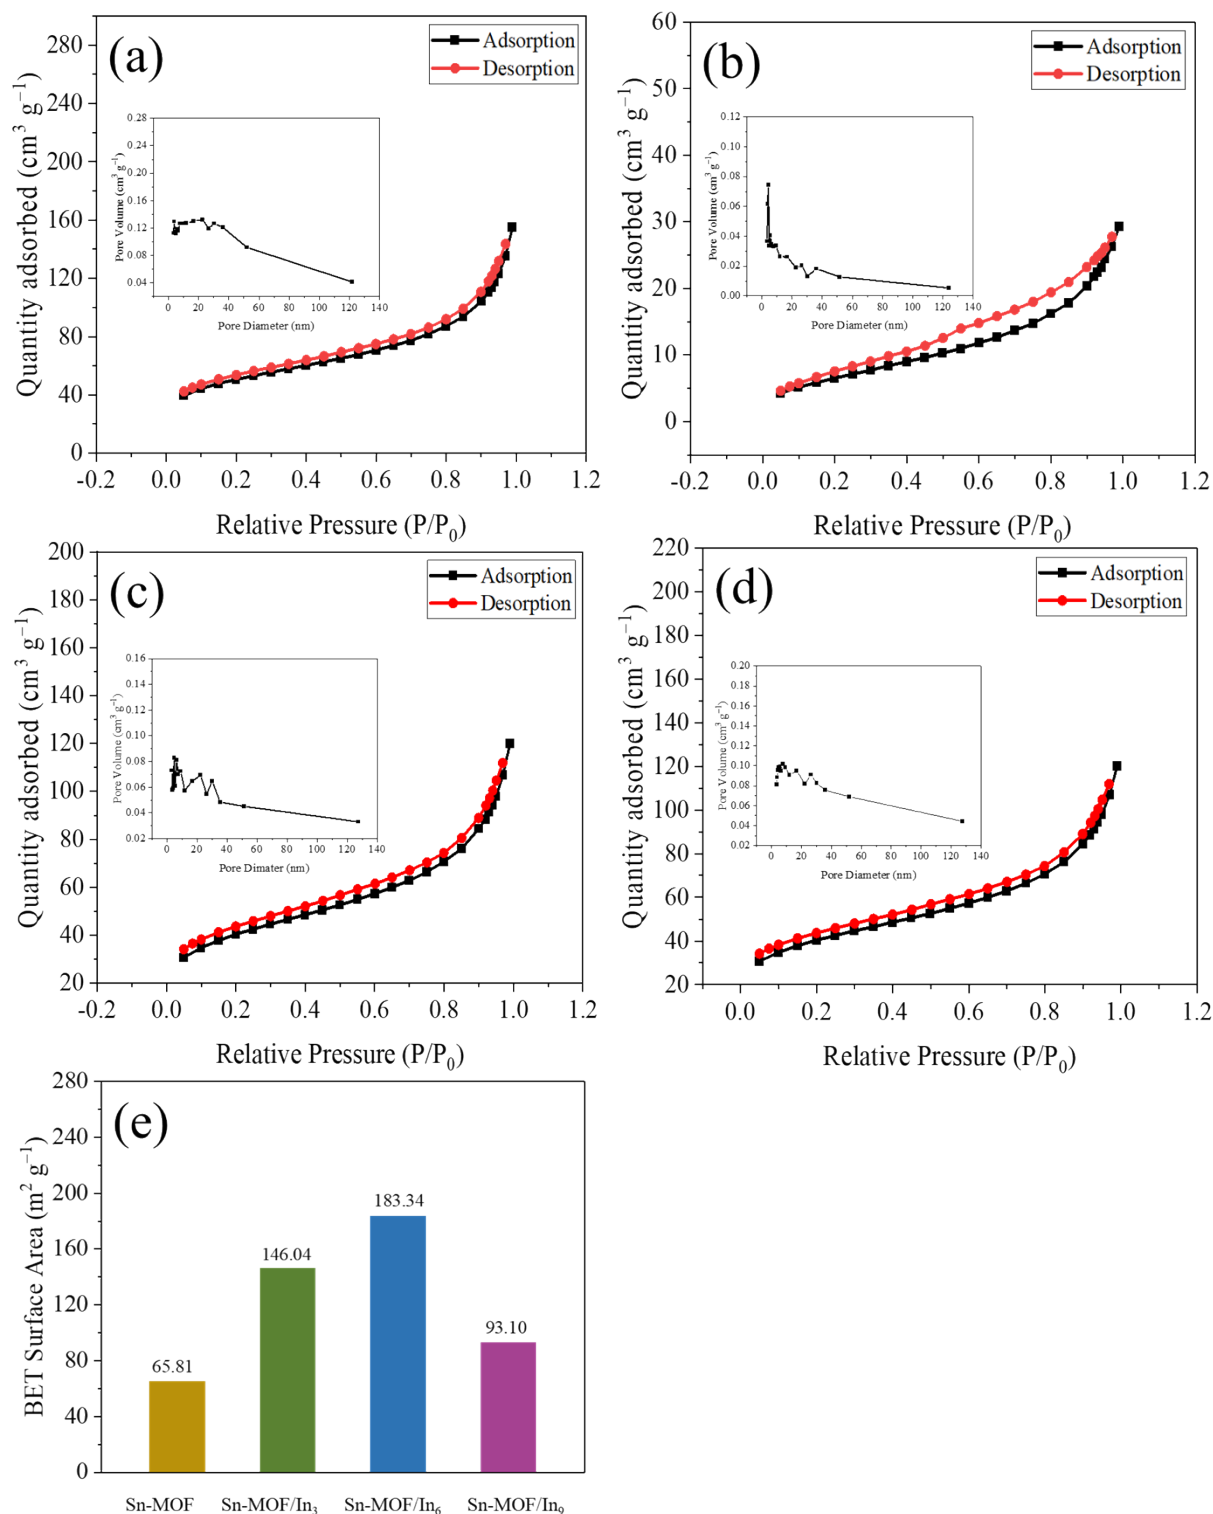

**Fig. S8.** The nitrogen adsorption-desorption isotherms of (a) Sn-MOF (b) Sn-MOF/In<sub>3</sub> (c) Sn-MOF/In<sub>6</sub> (d) Sn-MOF/In<sub>9</sub> (The embedded graph is the pore size distribution curves of each catalyst material). (e) BET surface area of the four catalysts.

**Table S1.** Inductively Coupled Plasma Optical Emission Spectrometer (ICP-OES) results for Indium contents in the series of catalysts.

| Material  | Sn-MOF | Sn-MOF/In <sub>3</sub> | Sn-MOF/In <sub>6</sub> | Sn-MOF/In <sub>9</sub> |
|-----------|--------|------------------------|------------------------|------------------------|
| In (wt %) | 0 %    | 1.75 %                 | 3.16 %                 | 4.54 %                 |

**Table S2.** The conclusion of Sn/In bimetallic catalysts in CO<sub>2</sub>ER.

| Materials                                                         | FE <sub>formate</sub> | Potential              | Electrolyte             | Ref.      |
|-------------------------------------------------------------------|-----------------------|------------------------|-------------------------|-----------|
| Indium Tin<br>Oxide<br>Nanocrystals                               | 87%                   | -0.85 V <sub>RHE</sub> | 1.0 M KOH               | 1         |
| In-Sn alloy<br>catalysts<br>In <sub>0.90</sub> Sn <sub>0.10</sub> | 92%                   | -1.2 V <sub>RHE</sub>  | 0.1 M KHCO <sub>3</sub> | 2         |
| In-Sn alloy<br>core-shell<br>nanoparticles                        | 86%                   | -0.9 V <sub>RHE</sub>  | 0.1 M KHCO <sub>3</sub> | 3         |
| In-O-ultrathin-<br>SnS <sub>2</sub> nanosheets                    | 88.6%                 | -1.2 V <sub>RHE</sub>  | 0.5 M KHCO <sub>3</sub> | 4         |
| Sn-MOF/In <sub>6</sub>                                            | 97.5%                 | -0.96 V <sub>RHE</sub> | 0.5 M KHCO <sub>3</sub> | This work |

**Table S3.** BET specific surface area and pore volume aperture data

| Material              | Specific surface area<br>( $\text{m}^2 \text{g}^{-1}$ ) | Pore diameter (nm) | Pore volume<br>( $\text{cc g}^{-1}$ ) |
|-----------------------|---------------------------------------------------------|--------------------|---------------------------------------|
| Sn-MOF                | 65.18                                                   | 3.85               | 0.068                                 |
| Sn-MOF/ $\text{In}_3$ | 146.04                                                  | 3.62               | 0.133                                 |
| Sn-MOF/ $\text{In}_6$ | 183.34                                                  | 3.61               | 0.175                                 |
| Sn-MOF/ $\text{In}_9$ | 93.101                                                  | 3.41               | 0.096                                 |

**Table S4.** The conclusion of BET specific surface area of Sn-MOF materials applied in various application field.

| Material                                               | BET specific surface area              | Application field                                           | Ref.      |
|--------------------------------------------------------|----------------------------------------|-------------------------------------------------------------|-----------|
| Sn-MOF                                                 | 48.679 m <sup>2</sup> g <sup>-1</sup>  | its adsorption application for Acid Red 3R                  | 5         |
| Facile synthesis of Sn(II)-MOF using waste PET bottles | 292 m <sup>2</sup> g <sup>-1</sup>     | Role of surface charge reversal in adsorption of toxic ions | 6         |
| Sn(II)-BDC MOF                                         | 17 m <sup>2</sup> g <sup>-1</sup>      | Preferential and efficient adsorption of anionic dyes       | 7         |
| Fe <sub>3</sub> O <sub>4</sub> @Sn-MOF                 | 59.949 m <sup>2</sup> g <sup>-1</sup>  | photocatalytic performance                                  | 8         |
| Sn-MOF (as precursors)                                 | 72.76 m <sup>2</sup> g <sup>-1</sup>   | superior lithium and sodium storage                         | 9         |
| Sn-MOF (for synthesis Sn-MOF@CNT nanocomposite)        | 309 m <sup>2</sup> g <sup>-1</sup>     | detection of hydrogen peroxide                              | 10        |
| Sn-MOF (for synthesis hexahedron SnS <sub>2</sub> /C)  | 30.1915 m <sup>2</sup> g <sup>-1</sup> | lithium-ion batteries                                       | 11        |
| Sn-MOF/In <sub>6</sub>                                 | 183.3 m <sup>2</sup> g <sup>-1</sup>   | Electrochemical reduction of CO <sub>2</sub>                | This work |

## Reference

1. H. R. Jhong, U. O. Nwabara, S. Shubert-Zuleta, N. S. Grundish, B. Tandon, L. C. Reimnitz, C. M. Staller, G. K. Ong, C. A. S. Cabezas, J. B. Goodenough, P. J. A. Kenis and D. J. Milliron, *Chem. Mat.*, 2021, **33**, 7675-7685.
2. Q. Lai, N. Yang and G. Q. Yuan, *Electrochem. Commun.*, 2017, **83**, 24-27.
3. J. G. Wang, S. L. Ning, M. Luo, D. Xiang, W. Chen, X. W. Kang, Z. Jiang and S. W. Chen, *Appl. Catal. B-Environ.*, 2021, **288**, 119979.
4. X. X. Zhang, M. Y. Jiao, Z. P. Chen, X. Ma, Z. H. Wang, N. L. Wang, X. P. Zhang and L. C. Liu, *Chem. Eng. J.*, 2022, **429**.
5. D. Li, L. L. Huang, Y. Tian, T. T. Liu, L. Zhen and Y. J. Feng, *Appl. Catal. B-Environ.*, 2021, **292**, 120119.
6. A. Ghosh and G. Das, *J. Environ. Chem. Eng.*, 2021, **9**, 105288.
7. A. Ghosh and G. Das, *Microporous Mesoporous Mat.*, 2020, **297**, 110039.
8. L. Yue, Y. Cao, Y. Han, Z. Li, X. Luo and Y. Liu, *J. Alloy. Compd.*, 2021, **870**, 159339.
9. X. C. Li, C. J. He, J. Zheng, W. K. Ye, W. H. Yin, B. H. J. Tang and Y. C. Rui, *J. Alloy. Compd.*, 2020, **842**, 155605.
10. S. Rani, B. Sharma, R. Malhotra, S. Kumar, R. S. Varma and N. Dilbaghi, *Environ. Res.*, 2020, **191**, 110005.
11. X. Y. Xiao, F. J. Zhao, J. Liu, Z. Wang, Q. X. Sui and M. X. Tan, *Mater Lett*, 2021, **296**, 129877.
